# Supplementary material for: Structural Analysis and Antioxidant and Immunoregulatory Activities of an Exopolysaccharide Isolated from Bifidobacterium longum subsp. longum XZ01
Source: MDPI journal article supplement (doi:10.3390/molecules28217448), 2023-11-06
Supplement: s1 [file s1]

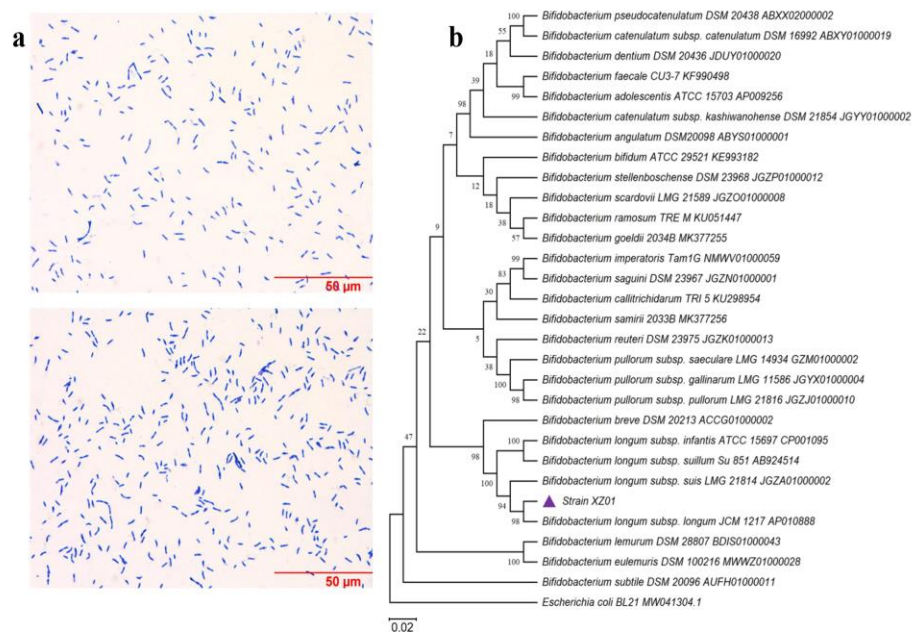

**Figure S1.** Gram staining results (a) and phylogenetic tree (b) of *Bifidobacterium longum* subsp. *longum* XZ01.

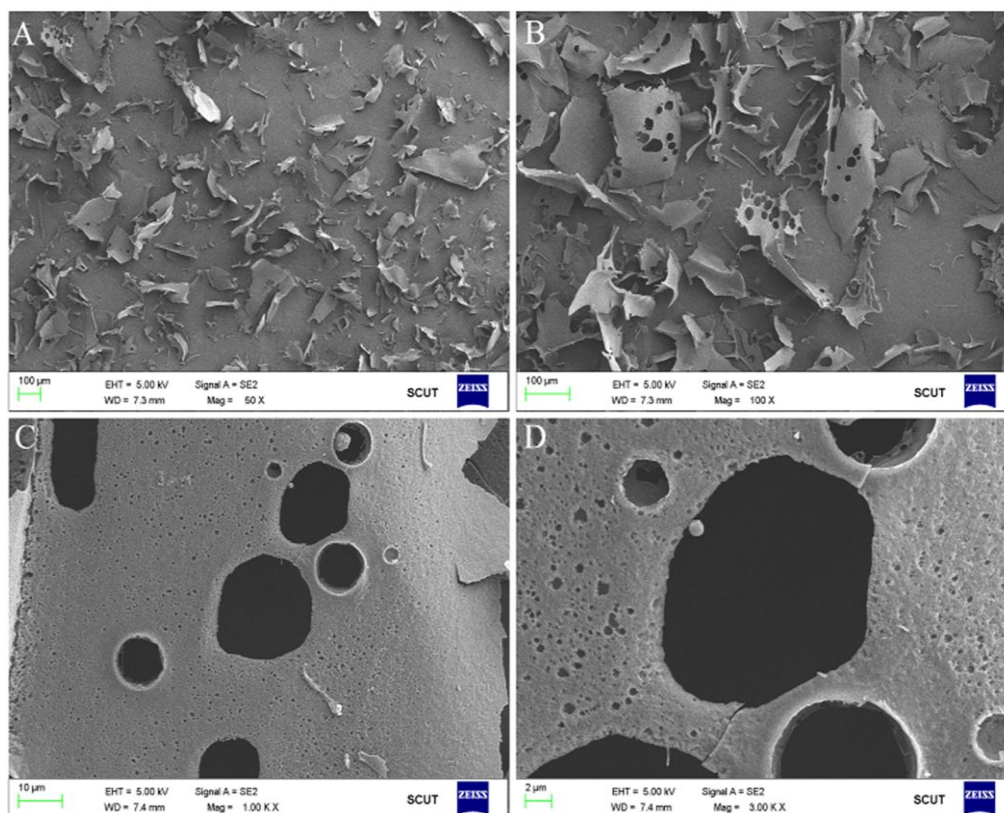

**Figure S2.** SEM images of S-EPS-1. A. 50  $\times$ ; B. 100  $\times$ ; C. 1000  $\times$ ; D. 3000  $\times$ .

**Table S1.** PCR primer sequences.

| Primer name   |         | Sequence (5'→3')         |
|---------------|---------|--------------------------|
| GAPDH         | Forward | GTGTTCTACCCCCAATGTGT     |
|               | Reverse | ATTGTCATACCAGGAAATGAGCTT |
| IL-1 $\beta$  | Forward | CTTCAGGCAGGCAGTATCACTC   |
|               | Reverse | TGCAGTTGTCTAATGGGAACGT   |
| IL-6          | Forward | CCTACCCCAATTTCCAATGCTC   |
|               | Reverse | GGTCTTGGTCCTTAGCCACTC    |
| TNF- $\alpha$ | Forward | GATCGGTCCCCAAAGGGATG     |
|               | Reverse | GTGGTTTGTGAGTGTGAGGGT    |
